# Supplementary material for: Meta-Analysis of Neoadjuvant Immunotherapy for Patients with Resectable Non-Small Cell Lung Cancer
Source: MDPI journal article supplement (doi:10.3390/curroncol28060395), 2021-11-14
Supplement: s1 [file s1]

# Meta-Analysis of Neoadjuvant Immunotherapy for Patients with Resectable Non-Small Cell Lung Cancer

Christopher Cao, Anthony Le, Matthew Bott, Jeffrey Yang, Dominique Gossot, Franca Melfi, David H. Tian and Allen Guo

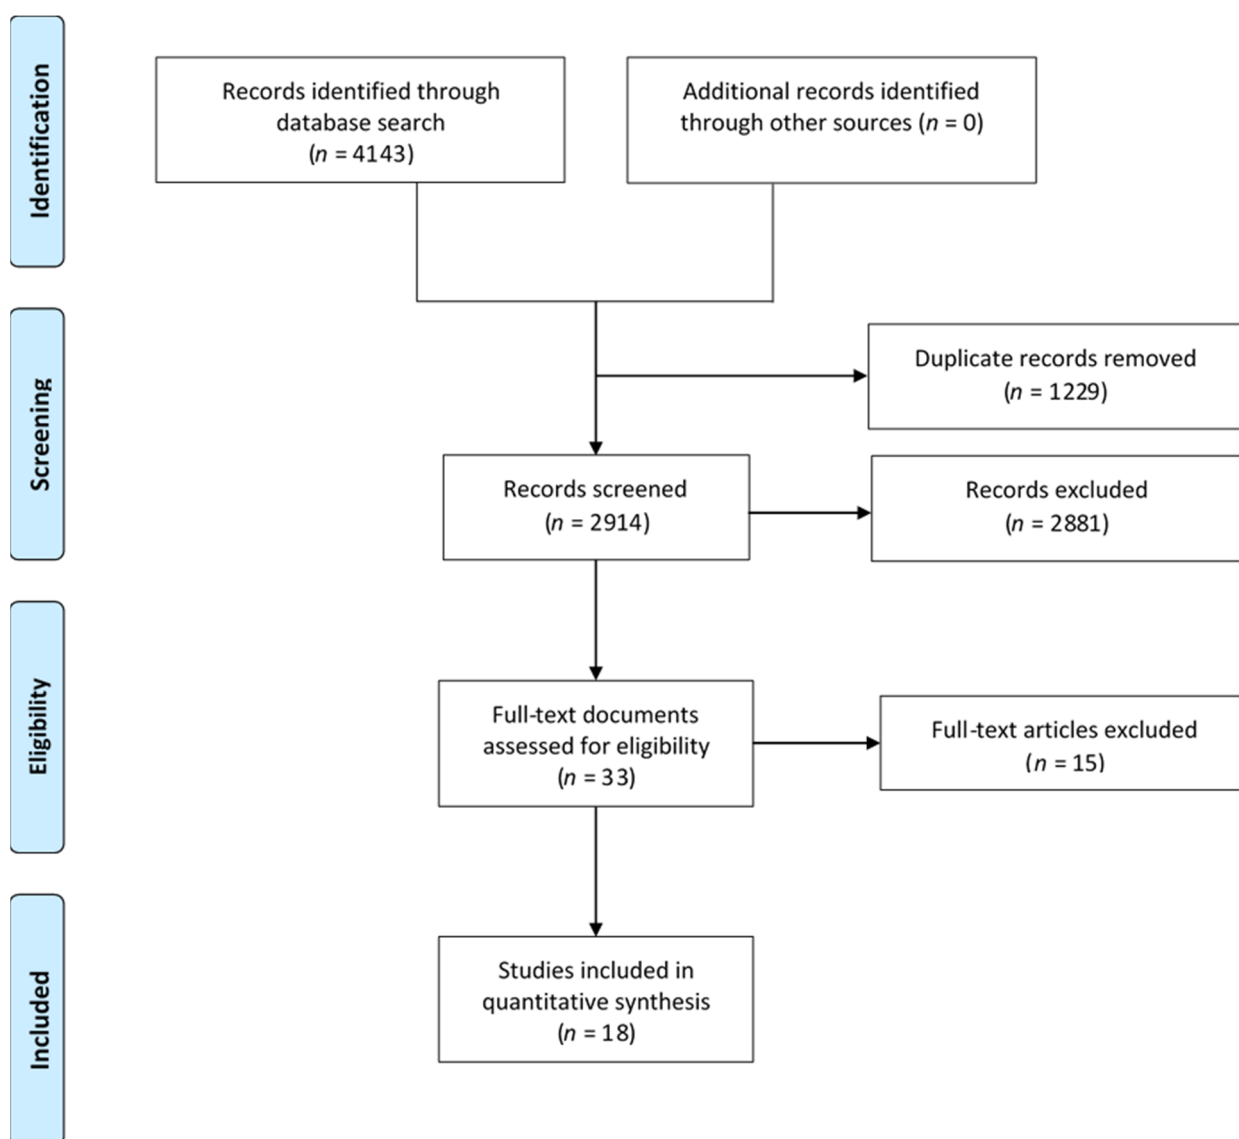

**Figure S1.** PRISMA flow chart detailing the literature search process for studies on neoadjuvant immunotherapy and surgery for non-small cell lung cancer.

### Post-surgical adverse outcomes after neoadjuvant immunotherapy

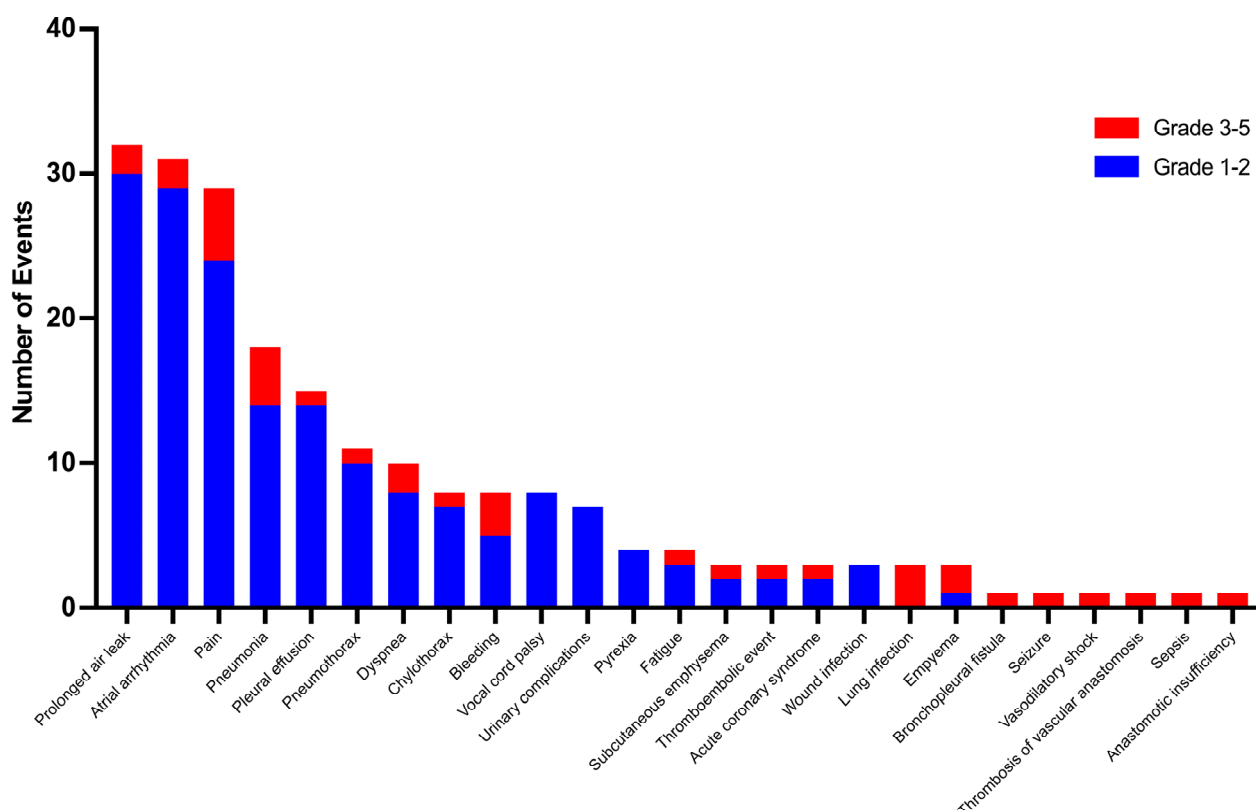

**Figure S2.** Post-surgical adverse events for patients with resectable non-small cell lung cancer after neoadjuvant immunotherapy.

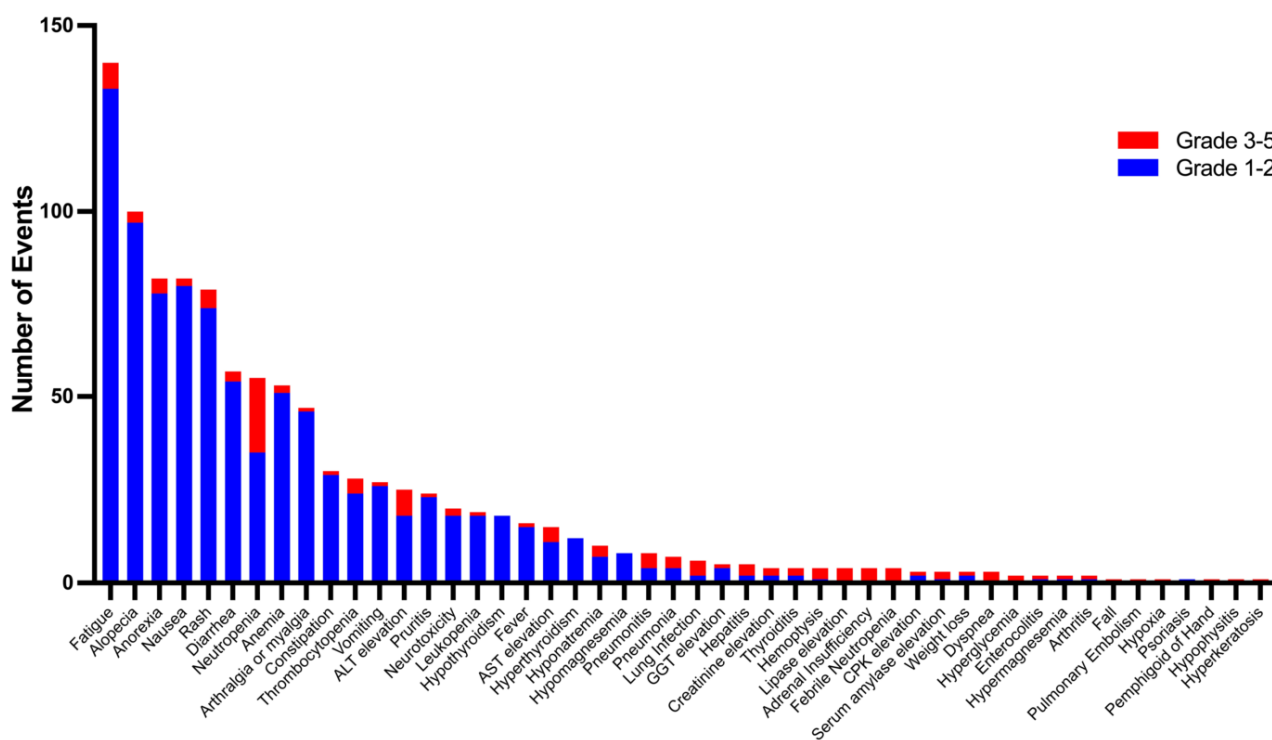

**Figure S3.** Treatment-related adverse events for patients with resectable non-small cell lung cancer after neoadjuvant systemic therapy.

**Table S1.** Postoperative surgical adverse events of patients who underwent neoadjuvant immunotherapy and resection for non-small cell lung cancer.

|                          | Proven<br>Rothsch<br>ild <sup>5</sup> | cio <sup>6</sup><br>Roman <sup>7</sup> | Casco<br>ne <sup>8</sup> | Eiccho<br>rn <sup>9</sup> | Tong <sup>10</sup> | Shu <sup>11</sup> | Bott <sup>12</sup><br>Forde <sup>13</sup> | Gao <sup>14</sup> | Yang <sup>15</sup> | Wang <sup>16</sup> | Shen <sup>17</sup> | Jiang <sup>18</sup> | Huan<br>g <sup>19</sup> | Dua<br>n <sup>20</sup> | Chen <sup>21</sup> | Che<br>n <sup>22</sup> |
|--------------------------|---------------------------------------|----------------------------------------|--------------------------|---------------------------|--------------------|-------------------|-------------------------------------------|-------------------|--------------------|--------------------|--------------------|---------------------|-------------------------|------------------------|--------------------|------------------------|
| 30-day mortality         | 1                                     | 0                                      | 0                        | 0                         | 0                  | 1                 | 0                                         | 2                 | 0                  | 0                  | 0                  | 0                   | 0                       | 0                      | 0                  | 0                      |
| HLOS (days)              | -                                     | 5                                      | -                        | -                         | 4                  | 4                 | 4                                         | -                 | 5                  | -                  | -                  | 7                   | 5.8                     | 11                     | -                  | -                      |
| Pneumonia                | -                                     | 5                                      | 1*                       | 1                         | 1                  | 1*                | 1 <sup>^</sup>                            | 1*                | 0                  | 4                  | 2                  | 1                   | -                       | -                      | -                  | -                      |
| Prolonged air leak       | 1 <sup>^</sup>                        | 8                                      | -                        | -                         | 4                  | -                 | 1                                         | -                 | 2                  | -                  | -                  | 14                  | 1 <sup>^</sup>          | -                      | 1                  | -                      |
| Atrial arrhythmia        | -                                     | 4                                      | -                        | -                         | 6                  | 3                 | 6                                         | -                 | 1 <sup>^</sup>     | 5                  | 2                  | 3                   | 1 <sup>^</sup>          | 0                      | -                  | -                      |
| Chylothorax              | 1 <sup>^</sup>                        | 1                                      | -                        | -                         | -                  | -                 | -                                         | -                 | -                  | 3                  | 1                  | 1                   | -                       | -                      | 1                  | -                      |
| Vocal cord palsy         | 1                                     | 1                                      | -                        | -                         | -                  | -                 | -                                         | -                 | 1                  | 2                  | 2                  | -                   | -                       | 1                      | -                  | -                      |
| Pain                     | 26 <sup>^</sup>                       | 1                                      | -                        | -                         | -                  | -                 | -                                         | 1                 | 1                  | -                  | -                  | -                   | -                       | -                      | -                  | -                      |
| Bleeding                 | 3 <sup>^*</sup>                       | 2                                      | -                        | -                         | -                  | -                 | -                                         | -                 | -                  | -                  | 2                  | -                   | -                       | -                      | 1                  | -                      |
| Urinary complications    | -                                     | -                                      | -                        | -                         | -                  | 2                 | 1                                         | -                 | 3                  | -                  | -                  | -                   | -                       | 1                      | -                  | -                      |
| Pleural effusion         | 4 <sup>^</sup>                        | -                                      | -                        | -                         | -                  | -                 | -                                         | -                 | -                  | 8                  | 3                  | -                   | -                       | -                      | -                  | -                      |
| Subcutaneous emphysema   | -                                     | 1                                      | -                        | -                         | 1                  | -                 | -                                         | -                 | -                  | -                  | -                  | -                   | 1 <sup>^</sup>          | -                      | -                  | -                      |
| Thromboembolic event     | -                                     | -                                      | -                        | -                         | 1                  | -                 | 1                                         | -                 | 1 <sup>^</sup>     | -                  | -                  | -                   | -                       | -                      | -                  | -                      |
| Acute coronary syndrome  | 1 <sup>^</sup>                        | -                                      | -                        | -                         | -                  | -                 | 1                                         | -                 | 1                  | -                  | -                  | -                   | -                       | -                      | -                  | -                      |
| Pyrexia                  | 2                                     | -                                      | -                        | -                         | -                  | -                 | -                                         | 1                 | 1                  | -                  | -                  | -                   | -                       | -                      | -                  | -                      |
| Wound infection          | -                                     | -                                      | -                        | -                         | 1                  | -                 | -                                         | 1                 | -                  | -                  | -                  | 1                   | -                       | -                      | -                  | -                      |
| Pneumothorax             | 2 <sup>^</sup>                        | -                                      | -                        | -                         | -                  | -                 | -                                         | -                 | -                  | -                  | 9                  | -                   | -                       | -                      | -                  | -                      |
| Empyema                  | 1 <sup>^</sup>                        | -                                      | 1*                       | -                         | -                  | -                 | 1                                         | -                 | -                  | -                  | -                  | -                   | -                       | -                      | -                  | -                      |
| Dyspnea                  | 10 <sup>^</sup>                       | -                                      | -                        | -                         | -                  | -                 | -                                         | -                 | -                  | -                  | -                  | -                   | -                       | -                      | -                  | -                      |
| Fatigue                  | 4 <sup>^</sup>                        | -                                      | -                        | -                         | -                  | -                 | -                                         | -                 | -                  | -                  | -                  | -                   | -                       | -                      | -                  | -                      |
| Lung infection           | 3 <sup>^</sup>                        | -                                      | -                        | -                         | -                  | -                 | -                                         | -                 | -                  | -                  | -                  | -                   | -                       | -                      | -                  | -                      |
| Bronchopleural fistula   | -                                     | -                                      | 1*                       | -                         | -                  | -                 | -                                         | -                 | -                  | -                  | -                  | -                   | -                       | -                      | -                  | -                      |
| Seizure                  | -                                     | -                                      | -                        | -                         | -                  | -                 | -                                         | 1*                | -                  | -                  | -                  | -                   | -                       | -                      | -                  | -                      |
| Vasodilatory shock       | -                                     | -                                      | -                        | -                         | -                  | -                 | -                                         | -                 | 1 <sup>^</sup>     | -                  | -                  | -                   | -                       | -                      | -                  | -                      |
| Anastomosis complication | 1 <sup>^</sup>                        | 1 <sup>^</sup>                         | -                        | -                         | -                  | -                 | -                                         | -                 | -                  | -                  | -                  | -                   | -                       | -                      | -                  | -                      |
| Sepsis                   | 1*                                    | -                                      | -                        | -                         | -                  | -                 | -                                         | -                 | -                  | -                  | -                  | -                   | -                       | -                      | -                  | -                      |

<sup>^</sup>Grade 3-4 Adverse Event; \*Grade 5 Adverse Event; HLOS, Hospital length of stay; Tabulated adverse events were limited to those reported in 3 or more studies, or if the adverse outcome was grade  $\geq 3$ .

**Table S2.** A summary of treatment-related adverse events for patients who underwent neoadjuvant immunotherapy for resectable non-small cell lung cancer.

|               | Rothschil<br>d <sup>5</sup> | Proveni<br>o <sup>6</sup><br>Roman <sup>7</sup> | Cascon<br>e <sup>8</sup> | Eicchor<br>n <sup>9</sup> | Tong <sup>10</sup> | Shu <sup>11</sup> | Bott <sup>12</sup><br>Forde <sup>13</sup> | Gao <sup>14</sup> | Yang <sup>15</sup> | Wang <sup>16</sup> | Shen <sup>17</sup> | Jiang <sup>18</sup> | Huang <sup>19</sup> | Duan <sup>20</sup> | Chen <sup>21</sup> | Che<br>n <sup>22</sup> |
|---------------|-----------------------------|-------------------------------------------------|--------------------------|---------------------------|--------------------|-------------------|-------------------------------------------|-------------------|--------------------|--------------------|--------------------|---------------------|---------------------|--------------------|--------------------|------------------------|
| Anemia        | -                           | 7                                               | 5                        | -                         | -                  | 21*               | -                                         | -                 | 4                  | 9*                 | 4                  | -                   | -                   | 3                  | -                  | -                      |
| ALT elevation | 4*                          | 5*                                              | 3                        | -                         | <10%               | 6*                | 1                                         | 2                 | -                  | -                  | 4*                 | -                   | -                   | -                  | -                  | -                      |
| AST elevation | 3*                          | -                                               | 1                        | -                         | <10%               | 5*                | -                                         | 2                 | -                  | -                  | 4                  | -                   | -                   | -                  | -                  | -                      |
| GGT elevation | -                           | -                                               | -                        | -                         | -                  | -                 | -                                         | 5*                | -                  | -                  | -                  | -                   | -                   | -                  | -                  | -                      |
| CPK elevation | -                           | -                                               | -                        | -                         | -                  | -                 | -                                         | 3*                | -                  | -                  | -                  | -                   | -                   | -                  | -                  | -                      |

|                  |                         |     |     |    |    |       |     |    |    |    |     |    |   |    |     |   |    |
|------------------|-------------------------|-----|-----|----|----|-------|-----|----|----|----|-----|----|---|----|-----|---|----|
|                  | Lipase elevation        | 1*  | 3*  | -  | -  | -     | -   | -  | -  | -  | -   | -  | - | -  | -   | - | -  |
|                  | Neutropenia             | -   | 4*  | -  | -  | -     | 26* | -  | -  | -  | 10* | 8* | - | -  | 7   | - | -  |
|                  | Thrombocytopenia        | -   | -   | -  | -  | -     | 19* | -  | -  | -  | 6*  | 3* | - | -  | -   | - | -  |
|                  | Leukopenia              | -   | -   | -  | -  | -     | -   | -  | -  | -  | 12* | -  | - | -  | 7   | - | -  |
|                  | Creatinine elevation    | -   | 3*  | 1  | -  | -     | -   | -  | -  | -  | -   | -  | - | -  | -   | - | -  |
|                  | Serum amylase elevation | -   | 3*  | -  | -  | -     | -   | -  | -  | -  | -   | -  | - | -  | -   | - | -  |
|                  | Febrile neutropenia     | -   | 3*  | -  | -  | -     | 1*  | -  | -  | -  | -   | -  | - | -  | -   | - | -  |
| Gastrointestinal | Nausea                  | 9*  | 15  | 8  | -  | <10%  | 13  | -  | 2  | 1  | 29* | 5  | - | -  | -   | - | -  |
|                  | Vomiting                | -   | 8   | 2  | -  | -     | 5   | 2  | -  | 1  | -   | -  | - | -  | 9*  | - | -  |
|                  | Constipation            | -   | 8   | -  | -  | -     | 7   | -  | -  | -  | 9*  | 5  | - | -  | 1   | - | -  |
|                  | Diarrhea                | 12* | 11  | 9* | -  | 7     | 9*  | 2  | -  | -  | -   | 4  | - | -  | 2   | 1 | -  |
|                  | Enterocolitis           | -   | -   | -  | 1  | -     | -   | -  | -  | -  | -   | -  | - | 1* | -   | - | -  |
|                  | Hepatitis               | 1*  | -   | -  | -  | -     | -   | -  | -  | -  | -   | -  | - | 4* | -   | - | -  |
| Systemic         | Fatigue                 | 24* | 24* | 15 | -  | 5     | 17* | -  | -  | 1  | 39* | 5  | - | -  | 10* | - | -  |
|                  | Weight loss             | -   | -   | -  | -  | -     | 2*  | -  | -  | 1  | -   | -  | - | -  | -   | - | -  |
|                  | Anorexia                | -   | 9*  | 1  | -  | <10%  | 3   | 3  | -  | 1* | 51* | 6  | - | -  | 8*  | - | -  |
|                  | Fever                   | -   | -   | 1  | -  | -     | 3   | 1  | 6  | -  | 5*  | -  | - | -  | -   | - | -  |
|                  | Arthralgia or myalgia   | 8   | 21  | 2  | -  | 3     | 5   | -  | -  | -  | -   | 6  | - | -  | 2*  | - | -  |
|                  | Arthritis               | 2*  | -   | -  | -  | -     | -   | -  | -  | -  | -   | -  | - | -  | -   | - | -  |
|                  | Fall                    | -   | -   | 1* | -  | -     | -   | -  | -  | -  | -   | -  | - | -  | -   | - | -  |
| Metabolic        | Hyperglycemia           | -   | -   | -  | -  | <10%  | 1*  | -  | -  | -  | -   | -  | - | -  | 1*  | - | -  |
|                  | Hypermagnesemia         | -   | 1   | 1* | -  | -     | -   | -  | -  | -  | -   | -  | - | -  | -   | - | -  |
|                  | Hypomagnesemia          | -   | -   | 2  | -  | -     | 3   | -  | -  | 3  | -   | -  | - | -  | -   | - | -  |
|                  | Hyponatremia            | -   | -   | 5* | -  | -     | 2*  | -  | 2* | 1  | -   | -  | - | -  | -   | - | -  |
| Endocrine        | Adrenal insufficiency   | 1*  | -   | -  | -  | -     | -   | -  | -  | 3* | -   | -  | - | -  | -   | - | -  |
|                  | Hyperthyroidism         | 6   | -   | 2  | -  | <10%  | -   | -  | 3  | -  | -   | -  | - | -  | 1   | - | -  |
|                  | Thyroiditis             | -   | -   | -  | 4* | <10%  | -   | -  | -  | -  | -   | -  | - | -  | -   | - | -  |
|                  | Hypothyroidism          | -   | -   | 2  | -  | 3     | 3   | -  | 7  | -  | 2   | 1  | - | -  | -   | - | -  |
| Respiratory      | Hemoptysis              | -   | -   | 2* | -  | -     | -   | -  | 2  | -  | -   | -  | - | -  | -   | - | -  |
|                  | Pneumonitis             | 2*  | -   | 2* | -  | -     | -   | -  | 4* | -  | -   | -  | - | -  | -   | - | -  |
|                  | Lung infection          | 4*  | -   | -  | -  | -     | -   | -  | 2* | -  | -   | -  | - | -  | -   | - | -  |
|                  | Pulmonary embolism      | -   | -   | 1* | -  | -     | -   | -  | -  | -  | -   | -  | - | -  | -   | - | -  |
|                  | Hypoxia                 | -   | -   | 1* | -  | -     | -   | -  | -  | -  | -   | -  | - | -  | -   | - | -  |
|                  | Dyspnea                 | 3*  | -   | -  | -  | -     | -   | -  | -  | -  | -   | -  | - | -  | -   | - | -  |
|                  | Pneumonia               | -   | -   | 1* | -  | -     | -   | 1* | -  | -  | 4*  | -  | - | 1  | -   | - | -  |
|                  |                         |     |     |    |    |       |     |    |    |    |     |    |   |    |     |   |    |
| Skin             | Alopecia                | -   | 17* | -  | -  | -     | 14  | -  | -  | -  | 50* | 9  | - | -  | 10* | - | -  |
|                  | Rash                    | 9   | 11* | 18 | 1* | 4     | 5   | -  | 2  | -  | 20* | 4  | - | 2  | 1   | 1 | 1* |
|                  | Pruritis                | 10* | 7   | 4  | -  | 3     | -   | -  | -  | -  | -   | -  | - | -  | -   | - | -  |
|                  | Psoriasis               | -   | -   | 1  | -  | <10%* | -   | -  | -  | -  | -   | -  | - | -  | -   | - | -  |
|                  | Hyperkeratosis          | 1*  | -   | -  | -  | -     | -   | -  | -  | -  | -   | -  | - | -  | -   | - | -  |
|                  | Pemphigoid of hand      | -   | 1*  | -  | -  | -     | -   | -  | -  | -  | -   | -  | - | -  | -   | - | -  |
| Neurological     | Hypophysitis            | -   | -   | -  | 1* | -     | -   | -  | -  | -  | -   | -  | - | -  | -   | - | -  |
|                  | Neurotoxicity           | -   | 15* | -  | -  | -     | -   | -  | -  | -  | 1   | 4  | - | -  | -   | - | -  |

\*At least 1 or more ≥ Grade 3 treatment related adverse event.
